# Supplementary material for: Role of CES1 and ABCB1 Genetic Polymorphisms on Functional Response to Dabigatran in Patients with Atrial Fibrillation
Source: MDPI journal article supplement (doi:10.3390/jcm13092545), 2024-04-26
Supplement: s1 [file s1]

| Dabigatran 110 mg (n=43)              |                                  |                       |                      | P value | Dabigatran 150 mg (n=57)         |                       |                      |  | P value |
|---------------------------------------|----------------------------------|-----------------------|----------------------|---------|----------------------------------|-----------------------|----------------------|--|---------|
| Concentration<br>at trough<br>(ng/mL) | Wild-type<br>homozygosis<br>(GG) | Heterozygosis<br>(GT) | Mutant trait<br>(TT) |         | Wild-type<br>homozygosis<br>(GG) | Heterozygosis<br>(GT) | Mutant trait<br>(TT) |  |         |
|                                       | -                                | 84 (43-92)            | 58 (50-91)           | 0.69    | 83 (82-84)                       | 59 (58-69)            | 58 (42-76)           |  | 0.51    |
| Concentration<br>at peak<br>(ng/mL)   | Wild-type<br>homozygosis<br>(GG) | Heterozygosis<br>(GT) | Mutant trait<br>(TT) |         | Wild-type<br>homozygosis<br>(GG) | Heterozygosis<br>(GT) | Mutant trait<br>(TT) |  |         |
|                                       | -                                | 109 (89-156)          | 115 (101-144)        | 0.32    | 93 (92-94)                       | 146 (107-186)         | 132 (64-175)         |  | 0.72    |
| dTT at trough<br>(ng/mL)              | Wild-type<br>homozygosis<br>(GG) | Heterozygosis<br>(GT) | Mutant trait<br>(TT) |         | Wild-type<br>homozygosis<br>(GG) | Heterozygosis<br>(GT) | Mutant trait<br>(TT) |  |         |
|                                       | -                                | 90 (42-145)           | 90 (55-139)          | 0.72    | 129 (96-135)                     | 77 (43-127)           | 92 (57-125)          |  | 0.47    |
| dTT at peak<br>(ng/mL)                | Wild-type<br>homozygosis<br>(GG) | Heterozygosis<br>(GT) | Mutant trait<br>(TT) |         | Wild-type<br>homozygosis<br>(GG) | Heterozygosis<br>(GT) | Mutant trait<br>(TT) |  |         |
|                                       | -                                | 161 (75-207)          | 176 (148-213)        | 0.59    | 185 (154-224)                    | 168 (135-238)         | 190 (100-237)        |  | 0.92    |

**Supplementary Table S1.** dTT and concentrations at trough and at peak for dabigatran 110 mg and 150 mg dose according to different *CES1 rs22444613* polymorphisms. GG: guanine-guanine; GT: guanine-thymine; TT: thymine-thymine; dTT: diluted thrombin time

| Dabigatran 110 mg (n=43)              |                                  |                       |                      | P value | Dabigatran 150 mg (n=57)         |                       |                      |  | P value |
|---------------------------------------|----------------------------------|-----------------------|----------------------|---------|----------------------------------|-----------------------|----------------------|--|---------|
| Concentration<br>at trough<br>(ng/mL) | Wild-type<br>homozygosis<br>(AA) | Heterozygosis<br>(AG) | Mutant trait<br>(GG) |         | Wild-type<br>homozygosis<br>(AA) | Heterozygosis<br>(AG) | Mutant trait<br>(GG) |  |         |
|                                       | 92 (91-93)                       | 84 (48-192)           | 51 (50-58)           | 0.42    | 71 (58-83)                       | 64 (31-81)            | 58 (42-76)           |  | 0.79    |
| Concentration<br>at peak<br>(ng/mL)   | Wild-type<br>homozygosis<br>(AA) | Heterozygosis<br>(AG) | Mutant trait<br>(GG) |         | Wild-type<br>homozygosis<br>(AA) | Heterozygosis<br>(AG) | Mutant trait<br>(GG) |  |         |
|                                       | 109 (108-110)                    | 114 (91-156)          | 115 (103-132)        | 0.86    | 100 (93-106)                     | 160 (31-186)          | 132 (64-176)         |  | 0.74    |
| dTT at trough<br>(ng/mL)              | Wild-type<br>homozygosis<br>(AA) | Heterozygosis<br>(AG) | Mutant trait<br>(GG) |         | Wild-type<br>homozygosis<br>(AA) | Heterozygosis<br>(AG) | Mutant trait<br>(GG) |  |         |
|                                       | 106 (42-160)                     | 106 (59-143)          | 74 (42-95)           | 0.42    | 94 (58-135)                      | 84 (42-113)           | 98 (58-139)          |  | 0.40    |
| dTT at peak<br>(ng/mL)                | Wild-type<br>homozygosis<br>(AA) | Heterozygosis<br>(AG) | Mutant trait<br>(GG) |         | Wild-type<br>homozygosis<br>(AA) | Heterozygosis<br>(AG) | Mutant trait<br>(GG) |  |         |
|                                       | 206 (75-214)                     | 177 (139-232)         | 168 (72-204)         | 0.70    | 182 (136-258)                    | 168 (101-215)         | 191 (100-240)        |  | 0.56    |

**Supplementary Table S2. dTT and concentrations at trough and at peak for dabigatran 110 mg and 150 mg dose according to different *CES1 rs8192935* polymorphisms.** AA: adenine-adenine; AG: adenine-guanine; GG: guanine-guanine. dTT= diluted thrombin time
